# Supplementary material for: Attackenangst bei Migräne: Diagnostik und Behandlung
Source: Springer Nature journal article supplement (doi:10.1007/s00482-023-00711-y), 2023-04-18
Supplement: MOESM1 [file 25255222]

## Fragebogen zur Attackenangst bei Migräne (FAMI)

Als „Attackenangst“ wird die Sorge oder Angst vor dem Auftreten einer Migräneattacke bezeichnet. Vor allem im Vorfeld von wichtigen privaten oder beruflichen Ereignissen kann es zum Auftreten von Attackenangst kommen. Die Angst, durch eine Migräneattacke auszufallen, bedeutet oft eine zusätzliche emotionale Belastung und kann das Auftreten einer Migräneattacke begünstigen.

Der vorliegende Fragebogen wurde dazu entwickelt, das Ausmaß dieser Sorgen und Ängste zu erfassen. Nachfolgend finden Sie Aussagen, die sich auf mögliche Befürchtungen hinsichtlich des Auftretens einer Migräneattacke beziehen. Bitte geben Sie an, inwieweit Sie diesen Aussagen zustimmen. **Bitte beantworten Sie alle Fragen.** Sollte eine Frage gar nicht auf Sie zutreffen, kreuzen Sie „Starke Ablehnung“ an. Beziehen Sie sich bei Ihren Antworten auf Ihre gegenwärtige Lebenssituation.

**Starke Ablehnung:** Sie stimmen der Aussage auf keinen Fall zu oder Sie halten diese für völlig unzutreffend

**Ablehnung:** Sie stimmen der Aussage eher nicht zu oder Sie halten diese für unzutreffend

**Neutral:** Die Aussage ist weder richtig noch falsch, also weder zutreffend noch unzutreffend

**Zustimmung:** Sie stimmen der Aussage eher zu oder Sie halten diese für zutreffend

**Starke Zustimmung:** Sie stimmen der Aussage auf jeden Fall zu oder Sie halten diese für völlig zutreffend

---

Klan, T., Diezemann-Prößdorf, A., Guth, A.-L., Gaul, C. & Witthöft, M. Attackenangst bei Migräne: Diagnostik und Behandlung. *Schmerz* (2023). <https://doi.org/10.1007/s00482-023-00711-y>

|                                                                                                                                            | Starke<br>Ablehnung      | Ablehnung                | Neutral                  | Zustimmung               | Starke<br>Zustimmung     |
|--------------------------------------------------------------------------------------------------------------------------------------------|--------------------------|--------------------------|--------------------------|--------------------------|--------------------------|
| 1. In schmerzfremen Zeiten befürchte ich, dass bald eine Migräneattacke auftreten könnte.                                                  | <input type="checkbox"/> | <input type="checkbox"/> | <input type="checkbox"/> | <input type="checkbox"/> | <input type="checkbox"/> |
| 2. Ich habe Angst vor der nächsten Migräneattacke.                                                                                         | <input type="checkbox"/> | <input type="checkbox"/> | <input type="checkbox"/> | <input type="checkbox"/> | <input type="checkbox"/> |
| 3. In schmerzfremen Zeiten erinnere ich mich deutlich an die Belastungen der letzten Migräneattacke zurück.                                | <input type="checkbox"/> | <input type="checkbox"/> | <input type="checkbox"/> | <input type="checkbox"/> | <input type="checkbox"/> |
| 4. Ich versuche, das Eintreten einer Migräneattacke vorherzusagen (z.B. anhand von Regelmäßigkeiten in den Abständen der Migräneattacken). | <input type="checkbox"/> | <input type="checkbox"/> | <input type="checkbox"/> | <input type="checkbox"/> | <input type="checkbox"/> |
| 5. Vor wichtigen Terminen grübele ich über die Einschränkungen durch vergangene Migräneattacken.                                           | <input type="checkbox"/> | <input type="checkbox"/> | <input type="checkbox"/> | <input type="checkbox"/> | <input type="checkbox"/> |
| 6. Die Einschränkungen durch vergangene Migräneattacken sind mir auch in schmerzfremen Zeiten bewusst.                                     | <input type="checkbox"/> | <input type="checkbox"/> | <input type="checkbox"/> | <input type="checkbox"/> | <input type="checkbox"/> |
| 7. Ich habe Angst vor den Schmerzen einer kommenden Migräneattacke.                                                                        | <input type="checkbox"/> | <input type="checkbox"/> | <input type="checkbox"/> | <input type="checkbox"/> | <input type="checkbox"/> |
| 8. Ich befürchte, durch meine Migräneattacken gesundheitliche Spätfolgen zu erleiden.                                                      | <input type="checkbox"/> | <input type="checkbox"/> | <input type="checkbox"/> | <input type="checkbox"/> | <input type="checkbox"/> |
| 9. Vor wichtigen Ereignissen (z.B. beruflich, familiär, privat) befürchte ich, eine Migräneattacke zu bekommen.                            | <input type="checkbox"/> | <input type="checkbox"/> | <input type="checkbox"/> | <input type="checkbox"/> | <input type="checkbox"/> |
| 10. Ich befürchte, wegen einer Migräneattacke meinen Verpflichtungen nicht nachzukommen.                                                   | <input type="checkbox"/> | <input type="checkbox"/> | <input type="checkbox"/> | <input type="checkbox"/> | <input type="checkbox"/> |
| 11. Ich habe Angst, dass ich wegen meiner Migräneattacken meine sozialen Aufgaben nicht zufriedenstellend erfüllen kann.                   | <input type="checkbox"/> | <input type="checkbox"/> | <input type="checkbox"/> | <input type="checkbox"/> | <input type="checkbox"/> |
| 12. Ich befürchte, dass Leute schlecht über mich reden, wenn ich aufgrund einer Migräneattacke Termine absagen muss.                       | <input type="checkbox"/> | <input type="checkbox"/> | <input type="checkbox"/> | <input type="checkbox"/> | <input type="checkbox"/> |
| 13. Ich habe Angst, durch meine Migräneattacken schöne Dinge im Leben zu verpassen.                                                        | <input type="checkbox"/> | <input type="checkbox"/> | <input type="checkbox"/> | <input type="checkbox"/> | <input type="checkbox"/> |
| 14. Ich befürchte, dass mich meine Migräneattacken daran hindern, das Leben zu genießen.                                                   | <input type="checkbox"/> | <input type="checkbox"/> | <input type="checkbox"/> | <input type="checkbox"/> | <input type="checkbox"/> |

|                                                                                                                                                                         | Starke<br>Ablehnung      | Ablehnung                | Neutral                  | Zustimmung               | Starke<br>Zustimmung     |
|-------------------------------------------------------------------------------------------------------------------------------------------------------------------------|--------------------------|--------------------------|--------------------------|--------------------------|--------------------------|
| 15. Ich mache mir Sorgen, dass sich meine Migräneattacken negativ auf wichtige Beziehungen (z.B. Partnerschaft, Freundschaften, Kollegen) auswirken.                    | <input type="checkbox"/> | <input type="checkbox"/> | <input type="checkbox"/> | <input type="checkbox"/> | <input type="checkbox"/> |
| 16. Ich befürchte, dass ich durch meine Migräneattacken meine Lebensziele (z.B. beruflich, familiär, Freizeitbereich) nicht verwirklichen kann.                         | <input type="checkbox"/> | <input type="checkbox"/> | <input type="checkbox"/> | <input type="checkbox"/> | <input type="checkbox"/> |
| 17. Wenn ich Hinweissymptome auf eine Migräneattacke wahrnehme (z. B. Lichtempfindlichkeit), nehme ich vorsichtshalber Attackenmedikation (Schmerzmittel, Triptan) ein. | <input type="checkbox"/> | <input type="checkbox"/> | <input type="checkbox"/> | <input type="checkbox"/> | <input type="checkbox"/> |
| 18. Ich befürchte bei bestimmten äußeren Einflüssen (z.B. Wetter, Lichtreize, Menschenmengen, Lärm) eine Migräneattacke zu bekommen.                                    | <input type="checkbox"/> | <input type="checkbox"/> | <input type="checkbox"/> | <input type="checkbox"/> | <input type="checkbox"/> |
| 19. Ich befürchte bei bestimmten inneren Zuständen (z.B. starke Emotionen, Stressbelastung, Müdigkeit) eine Migräneattacke zu bekommen.                                 | <input type="checkbox"/> | <input type="checkbox"/> | <input type="checkbox"/> | <input type="checkbox"/> | <input type="checkbox"/> |
| 20. Ich befürchte, durch bestimmte Verhaltensweisen (z.B. Überanstrengung, unregelmäßiger Schlaf, Verzehr bestimmter Lebensmittel) eine Migräneattacke zu bekommen.     | <input type="checkbox"/> | <input type="checkbox"/> | <input type="checkbox"/> | <input type="checkbox"/> | <input type="checkbox"/> |
| 21. Ich versuche bestimmte äußere Einflüsse (z.B. Lichtreize, Menschenmengen, Lärm) zu vermeiden, um keine Migräneattacke zu provozieren.                               | <input type="checkbox"/> | <input type="checkbox"/> | <input type="checkbox"/> | <input type="checkbox"/> | <input type="checkbox"/> |
| 22. Ich vermeide gewisse Verhaltensweisen (z.B. Überanstrengung, unregelmäßiger Schlaf, Verzehr bestimmter Lebensmittel), um keine Migräneattacke zu provozieren.       | <input type="checkbox"/> | <input type="checkbox"/> | <input type="checkbox"/> | <input type="checkbox"/> | <input type="checkbox"/> |
| 23. Ich vermeide bestimmte innere Zustände (z.B. starke Emotionen, Stressbelastung, Müdigkeit), um keine Migräneattacke zu provozieren.                                 | <input type="checkbox"/> | <input type="checkbox"/> | <input type="checkbox"/> | <input type="checkbox"/> | <input type="checkbox"/> |
| 24. Ich schirme mich von bestimmten äußeren Reizen ab (z.B. durch Kopfhörer, Schal, Sonnenbrille), um keine Migräneattacke zu provozieren.                              | <input type="checkbox"/> | <input type="checkbox"/> | <input type="checkbox"/> | <input type="checkbox"/> | <input type="checkbox"/> |

|                                                                                                                                                                | Starke<br>Ablehnung      | Ablehnung                | Neutral                  | Zustimmung               | Starke<br>Zustimmung     |
|----------------------------------------------------------------------------------------------------------------------------------------------------------------|--------------------------|--------------------------|--------------------------|--------------------------|--------------------------|
| 25. Ich sage Termine im Vorfeld ab, aus Sorge durch diese eine Migräneattacke zu provozieren.                                                                  | <input type="checkbox"/> | <input type="checkbox"/> | <input type="checkbox"/> | <input type="checkbox"/> | <input type="checkbox"/> |
| 26. Nach dem Auftreten bestimmter innerer Zustände (z.B. starke Emotionen, Stressbelastung, Müdigkeit) achte ich besonders auf Anzeichen einer Migräneattacke. | <input type="checkbox"/> | <input type="checkbox"/> | <input type="checkbox"/> | <input type="checkbox"/> | <input type="checkbox"/> |
| 27. Ich horche regelmäßig in mich hinein, um Anzeichen für eine Migräneattacke zu erkennen.                                                                    | <input type="checkbox"/> | <input type="checkbox"/> | <input type="checkbox"/> | <input type="checkbox"/> | <input type="checkbox"/> |
| 28. Ich achte besonders auf erste Anzeichen einer Migräneattacke, um möglichst früh reagieren zu können.                                                       | <input type="checkbox"/> | <input type="checkbox"/> | <input type="checkbox"/> | <input type="checkbox"/> | <input type="checkbox"/> |
| 29. Meine Angst vor einer Migräneattacke spüre ich mit körperlichen Symptomen (z.B. Mundtrockenheit, Herzklopfen, innere Unruhe).                              | <input type="checkbox"/> | <input type="checkbox"/> | <input type="checkbox"/> | <input type="checkbox"/> | <input type="checkbox"/> |
